# Supplementary figures and images for: Classification and Identification of S Haplotypes in Radish Based on SRK Kinase Domain Sequence Analysis
Source: MDPI journal article supplement (doi:10.3390/plants11172304), 2022-09-02

Niikura 1

Kim S 1

Kon J O 1

Zhou 1

Kim H

Wang

Zhao

Lim

Kim D

Okamoto<sup>8</sup>

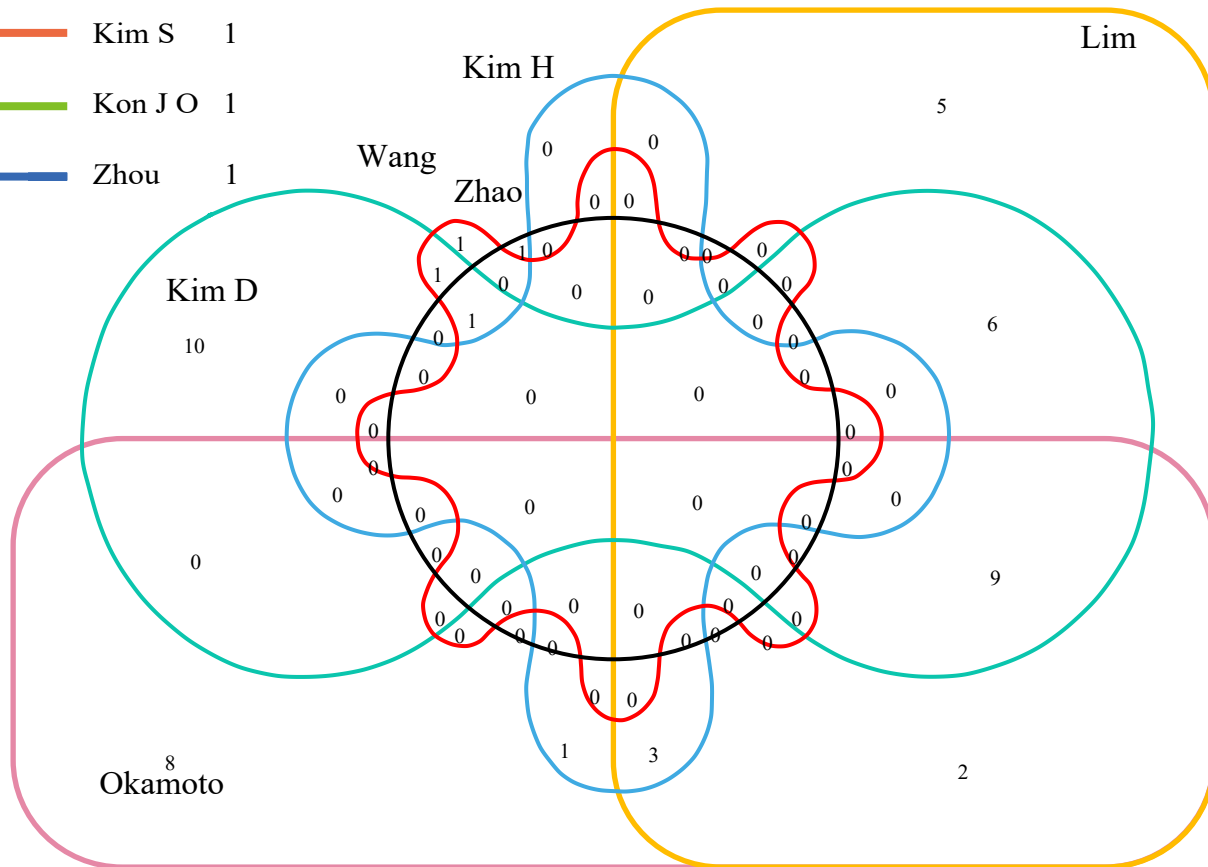

Supplement: s1 [file s1]
